# Supplementary material
Source: PubMed Central journal article supplement (PMC6340298)

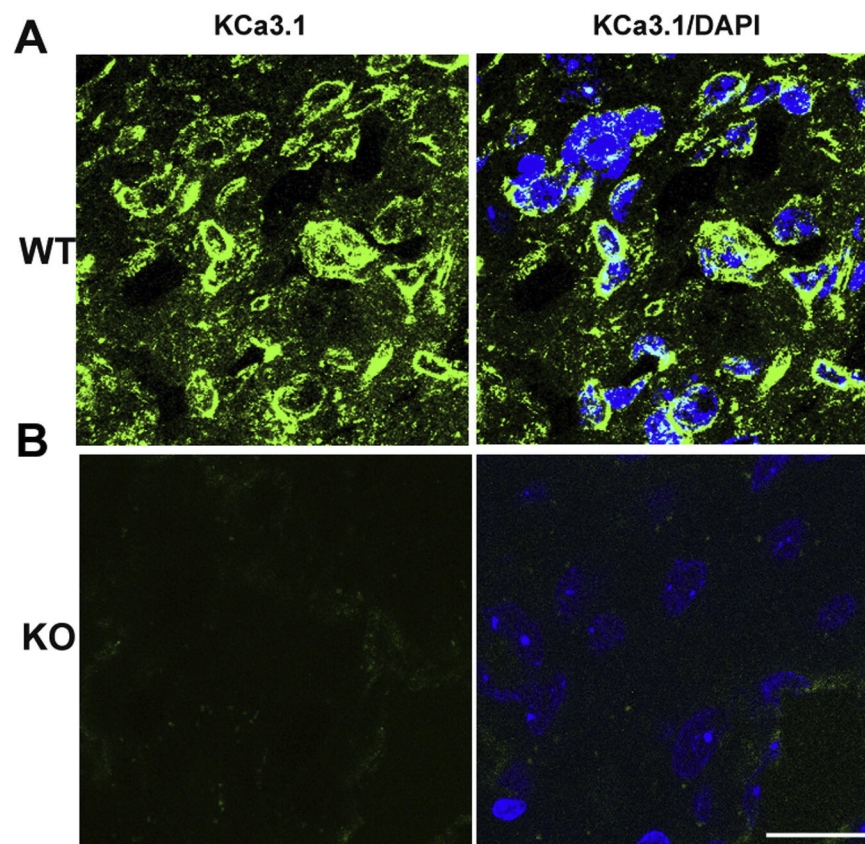

Supplementary Fig. 1. KCa3.1 staining in WT (A) and KO (B) mouse brain. Scar bar 50  $\mu$ M

Supplement: NIHMS999748-supplement-Supp_Fig__1.pdf [file NIHMS999748-supplement-Supp_Fig__1.pdf]
